# Supplementary material for: Returning to clinical work and doctors’ personal, social and organisational needs: a systematic review
Source: HighWire-hosted journal article supplement (doi:10.1136/bmjopen-2021-053798), 2022-05-01
Supplement: bmjopen-2021-053798supp003_data_supplement.pdf [file bmjopen-2021-053798supp003_data_supplement.pdf]

## Full data extraction, characteristics and findings of included studies.

| Authors                 | Study Design                               | Variable / outcome measurement                                                                       | Condition / absence details                     | Data analysis                                          | Sample                  | Recruitment / sampling                                                                                                | Setting | Demographics                                                                                                                                                                  | Response rate     | Key findings - personal, social, organisational needs                                                                                                                                                                                                                                                                                                                                                                                                                                                                                                                                                                             | Additional findings                                                                                                                                    | Recommendations                                                                                                                                                                                                                                                                                                                                                          | Risk of biases*                                                                    |
|-------------------------|--------------------------------------------|------------------------------------------------------------------------------------------------------|-------------------------------------------------|--------------------------------------------------------|-------------------------|-----------------------------------------------------------------------------------------------------------------------|---------|-------------------------------------------------------------------------------------------------------------------------------------------------------------------------------|-------------------|-----------------------------------------------------------------------------------------------------------------------------------------------------------------------------------------------------------------------------------------------------------------------------------------------------------------------------------------------------------------------------------------------------------------------------------------------------------------------------------------------------------------------------------------------------------------------------------------------------------------------------------|--------------------------------------------------------------------------------------------------------------------------------------------------------|--------------------------------------------------------------------------------------------------------------------------------------------------------------------------------------------------------------------------------------------------------------------------------------------------------------------------------------------------------------------------|------------------------------------------------------------------------------------|
| HEE (2018)[4]           | Cross-sectional survey                     | Needs, challenges and support required - de novo mixed methods survey                                | All reasons included                            | Mixed method - Descriptive statistics                  | 97 doctors              | Invitation email via UK Medical Royal Colleges, British Medical Association, NHS England and Health Education England | UK      | Not reported                                                                                                                                                                  | Not reported      | Personal - lack of confidence, emotional needs (coping and managing uncertainty), self-efficacy, childcare, communication and information about return. Social - views of colleagues. Organisational - pastoral support, wider support package, organisational culture, unfamiliar with workplace                                                                                                                                                                                                                                                                                                                                 | Returner views on support. Personal - training. Social - peer support. Organisational - phased return, clearer entry/exit & KIT process, mentor/coach. | Further collation of evidence and development of successful approaches required for supporting returning doctors, including policy advice and available resources                                                                                                                                                                                                        | Selection bias, recall bias, measurement bias, analysis bias (lack of methodology) |
| AoMRC (2016)[12]        | Cross-sectional survey                     | Barriers experienced - de novo mixed methods survey ('Flexibility & Equality Parental Leave Survey') | Parental leave                                  | Mixed method - Descriptive statistics                  | 1,225 doctors           | Invitation email to every member from each UK Medical Royal College                                                   | UK      | 70% female, 70% 31-46 years of age, spread across UK & specialties, 79% white ethnic background, majority doctors in training, 60% had more than 1 instance of parental leave | 84% response rate | Only 3.5% of respondents reported no worries about returning. Personal - self-efficacy, maintaining CPD, childcare, finance (main reason for pressure to return), emotional state (13.5% not emotionally ready to return), sleep deprivation, breastfeeding - delay to return and stopping early. Low concentration 45%. Social - 68% reported no family support, colleagues were a main source of info, relationships with colleagues. Colleagues views 34%. Organisational - medical HR were a main source of info, relationship with department. Significant lack of access to support. Flexibility, 75% full time down to 36% | Resources were identified for returners. Social - partner (48% of respondents), other parents (48%), workplace social support (14-20%)                 | Improved communications of support and resources available when returning from parental leave. Dedicated support for childcare and breastfeeding requirements. Access to the clinical information required, including updates and changes. A designated supervisor who is aware and supportive of RTW, and a workplace risk assessment in line with employment contracts | Selection bias, recall bias, measurement bias (lack of methodology)                |
| Brooks et al (2014)[29] | Qualitative semistructured interviews      | Experience of sick leave and RTW - 2hr semistructured interview                                      | Sick leave - any illness, for at least 6 months | Qualitative - Thematic analysis                        | 19 doctors              | Invitation email via a medical charity, UK regulator or confidential doctor health service                            | UK      | 10/19 female, age range 20s-60s, 18/19 mental health problem/addiction, 7 physical health problems, 14 involved with GMC                                                      | 25% response rate | Regulator interactions can be positive, helpful and necessary (e.g. with supportive supervisors and case workers) as well as distressing and anxiety provoking. Personal - clear information, emotional needs, empathy Social - Illness as a deficiency or flaw (attitudes). Organisational - RTW support, to the point of detriment to health. Lack of clear info and empathy in correspondence. Relationship with regulator                                                                                                                                                                                                     |                                                                                                                                                        | Improved distinction between ill health and misconduct in the way the regulator works with doctors. A dedicated process for ill health as this process can be a barrier to RTW. Improved communication and awareness from the regulator to reduce fear and anxiety for doctors                                                                                           | Selection bias                                                                     |
| Doran et al (2014)[30]  | Qualitative semistructured interviews      | Reasons for leaving & barriers to returning - 40-60 minute semistructured interview                  | Career break or leavers                         | Qualitative - Thematic analysis                        | 21 primary care doctors | Volunteer sampling following participation in an online survey (survey sampling not described)                        | UK      | 67% female, age range 32-54, years as a GP 2.5-20                                                                                                                             | 55% response rate | Personal - clear information, work-life balance, fear (emotional needs). Social - peer support, relationships with colleagues. Organisational - support package with process and information to access support, autonomy over role, work design (specialty specific concern, primary-secondary care interface and referrals), culture and working atmosphere                                                                                                                                                                                                                                                                      |                                                                                                                                                        |                                                                                                                                                                                                                                                                                                                                                                          | Selection bias, recall bias                                                        |
| Fox et al (2009)[31]    | Qualitative semistructured interviews      | Experience of sick leave and RTW - semistructured interviews                                         | Sick leave - any serious illness                | Qualitative - Interpretative Phenomenological Analysis | 17 primary care doctors | Invitation email via regional primary care provider and commissioner                                                  | UK      | 10/17 male, 31-69 years of age, mean 46 years, 16/17 white British                                                                                                            | Not reported      | Personal - emotional needs (feeling powerless, out of control, vulnerable due to patient-doctor status and label), managing disclosure, self-perception, self-stigma (internalising illness as a vulnerability)                                                                                                                                                                                                                                                                                                                                                                                                                   | Resources identified. Personal - awareness of RTW, increased empathy (e.g. self-disclosure), insight into doctor-patient relationship and power.       |                                                                                                                                                                                                                                                                                                                                                                          | Selection bias, recall bias                                                        |
| Gordon et al (2013)[32] | Cross-sectional survey                     | Experience of paternity leave - de novo mixed methods survey                                         | Parental leave - paternity                      | Mixed method - Descriptive statistics                  | 364 doctors             | Invitation message via a professional network (London Deanery Synapse)                                                | UK      | 32% consultants, 56% registrars, 10% more junior doctors, range of specialties                                                                                                | Not reported      | Personal - financial concerns, career implications. Social - balance family and care-giving needs. Organisational - clear information and knowledge of support, support package available, flexibility in working role, workload and staffing management, supportive culture                                                                                                                                                                                                                                                                                                                                                      |                                                                                                                                                        | Clearer parental leave policy and subsequent communication to raise awareness and uptake                                                                                                                                                                                                                                                                                 | Selection bias, recall bias, measurement bias, analysis bias (lack of methodology) |
| Grant et al (2019)[33]  | Biographical narrative interviewing method | Experience of mental health condition - biographical narrative interviews                            | Sick leave - mental health condition            | Qualitative - Thematic analysis                        | 10 doctors              | Invitation email via Health Education England & Wales Deanery, final sample selected purposively                      | UK      | 8/10 female, post-medical degree to registrar, cross-specialty                                                                                                                | Not reported      | Personal - managing disclosure, taking sick leave, loss of professional identity, career support and risk of damage Social - required perception of fulfilment from role, help-seeking behaviour, perception of sick leave and negative attitudes of colleagues Organisational - work design (high pressure, high risk duties, staffing and workforce issues), confidentiality and awareness of management, new colleagues and setting upon return                                                                                                                                                                                |                                                                                                                                                        | Improve the support available for doctors with mental health conditions, including a dedicated supervisor/mentor. OH input required but often lacking, and organisational and professionals attitudes towards mental health require improvement                                                                                                                          | Selection bias                                                                     |

|                                |                                       |                                                                                                     |                                                 |                                                                       |                                                                                  |                                                                                                        |        |                                                                                                                          |                   |                                                                                                                                                                                                                                                                                                                                                                                                                                                                                                                                    |                                                                                                                                                                                                                                                                  |                                                                                |                                                                                    |
|--------------------------------|---------------------------------------|-----------------------------------------------------------------------------------------------------|-------------------------------------------------|-----------------------------------------------------------------------|----------------------------------------------------------------------------------|--------------------------------------------------------------------------------------------------------|--------|--------------------------------------------------------------------------------------------------------------------------|-------------------|------------------------------------------------------------------------------------------------------------------------------------------------------------------------------------------------------------------------------------------------------------------------------------------------------------------------------------------------------------------------------------------------------------------------------------------------------------------------------------------------------------------------------------|------------------------------------------------------------------------------------------------------------------------------------------------------------------------------------------------------------------------------------------------------------------|--------------------------------------------------------------------------------|------------------------------------------------------------------------------------|
| Henderson et al (2012)[34]     | Qualitative semistructured interviews | Barriers experienced - 1-3hr semistructured interviews                                              | Sick leave - any illness, for at least 6 months | Qualitative - Thematic analysis                                       | 19 doctors                                                                       | Invitation email via a medical charity, UK regulator or confidential doctor health service             | UK     | 10/19 female, age range 20s-60s, 18/19 mental health problem/addiction, 7 physical health problems, 14 involved with GMC | 25% response rate | Personal - Work identity & career, personal identity changes, self-view and sense of failure in work and life generally, beyond low self-esteem to self-stigma Social - relationships with family and friends, stigmatisation, culture of competitiveness and toughness Organisational - support package                                                                                                                                                                                                                           | Reduce professional stigma towards mental health conditions and improve confidential Occupational Health services for doctors                                                                                                                                    | Selection bias                                                                 |                                                                                    |
| Hertzberg et al (2016)[35]     | Qualitative interviews                | Work-life balance & professional dedication - 60-90 minute focus group interviews                   | All reasons included                            | Qualitative - Systematic text condensation                            | 48 hospital doctors                                                              | Invitation email via union representatives and senior managers                                         | Norway | 56% female, 5-45 years experience, 22 registrars and 26 consultants, 19 Psychiatry, 15 internal medicine, 14 surgery     | Not reported      | Personal - work-life balance as there are too many things to balance and be a good doctor. Social - Colleague relationships, leave equals disloyalty. Organisational - work design (managing clinical and managerial/leadership duties), relationship with management and feeling valued                                                                                                                                                                                                                                           | Adapting the requirements of a doctor's role to their life stage and circumstances. Improve the logistical management of absences and professional attitudes towards taking leave. Closer working relationship between doctors, clinicians and senior management | Selection bias, analysis bias (based on methodology)                           |                                                                                    |
| McKevitt et al (1997)[36]      | Between groups comparison             | Prevalence & decision-making - quantitative survey & qualitative interviews                         | Sick leave - any illness                        | Mixed method - One-way ANOVA, logistic regression & thematic analysis | 1,102 doctors (532 primary care, 506 hospital doctors, 64 additional interviews) | Postal invitation survey via 3 NHS Trusts and 2 primary care providers                                 | UK     | Reported by each group in full in the paper                                                                              | 74% response rate | Work design and organisation, alongside poor staffing management and professional work ethic encourage presenteeism and poor attitudes towards sick leave. Personal - self-stigma. Social - attitudes and stigma towards illness representing weakness, pressure from colleagues, professional culture (work ethic), help-seeking behaviour. Organisational - work design and organisation (high pressure), staffing and workload management, organisational culture                                                               |                                                                                                                                                                                                                                                                  | Selection bias, measurement bias                                               |                                                                                    |
| Miller (2009)[37]              | Cross-sectional survey                | Experience of mental health condition - mixed methods survey                                        | Sick leave - mental health condition            | Mixed method - Descriptive statistics & content analysis              | 116 doctors                                                                      | Invitation message via a doctors peer support organisation (Doctors Support Network)                   | UK     | Mean age 45 (range 26-68), 63% female                                                                                    | 35% response rate | Upon returning there was a significantly lower proportion of full time work, replaced by part time working. RTW should be supported with a combination of personal, social and workplace strategies, preceded by preventative approaches where possible. Personal - work-life balance, caregiver duties, career support and damage, personal-professional identity, financial considerations Social - family and social support, colleague stigma and negative attitudes. Organisational - flexibility in working role, OH support | Resources - improved empathy, understanding and job satisfaction, self-awareness, relationships, varied career and WLB                                                                                                                                           | Flexibility to individual needs and work, alongside OH support                 | Selection bias, recall bias, measurement bias, analysis bias (lack of methodology) |
| Nomura et al (2015)[38]        | Cross-sectional survey                | Barriers experienced - de novo qualitative survey                                                   | All reasons included                            | Qualitative - Kawakita Jiro method (explained in full in paper)       | 359 female doctors                                                               | Invitation email via alumni association                                                                | Japan  | Median age 45 (range 38-53), 91% working clinically, 60% full time, 74% had children                                     | Not reported      | Personal - childcare and caregiver role, confidence in managing work-life balance, professional drive and identity. Social - expectation on working parents to manage personal and professional role. Organisational - work design (long hours and shift patterns), workload and staffing management (staff shortages)                                                                                                                                                                                                             |                                                                                                                                                                                                                                                                  | Selection bias, recall bias                                                    |                                                                                    |
| Perez-Alvarez et al (2019)[39] | Qualitative semistructured interviews | Experience of illness - semistructured interviews                                                   | Sick leave - any serious illness                | Qualitative - Inductive qualitative data analysis                     | 10 doctors                                                                       | Intentional sampling, no further description                                                           | Spain  | Not reported                                                                                                             | Not reported      | Personal - career support and damage, clear information, emotional needs, self-view (feel failure, failing colleagues), finance. Social - support from a mentor/supervisor, colleagues' views. Organisational - clear giving of info, workplace and role adaptations, job control                                                                                                                                                                                                                                                  | Resources - learn from experience                                                                                                                                                                                                                                | Improve the 1-to-1 support available from supervisors                          | Selection bias, recall bias, measurement bias, analysis bias (lack of methodology) |
| Reese et al (2015)[40]         | Cross-sectional survey                | Self-efficacy, clinical procedures - de novo survey ('Redeployment Specialty Skills Matrix Survey') | Active military duty                            | Quantitative - Descriptive statistics & chi squared                   | 179 family medicine doctors                                                      | Invitation email to all active duty medical officers eligible for redeployment via Army Medical Centre | US     | Not reported                                                                                                             | 49% response rate | Self-efficacy increased significantly for management of major trauma and significantly reduced or did not change for all other procedures/scenarios, demonstrating reduced self-efficacy. Personal - self-efficacy for clinical procedures                                                                                                                                                                                                                                                                                         | Only 16% of participants were offered support on returning, possibly due to perceptions of what constitutes absence and return.                                                                                                                                  | Additional training resources to improve self-efficacy for clinical procedures | Selection bias, recall bias, measurement bias                                      |
| Rizan et al (2019)[41]         | Qualitative semistructured interviews | Reasons for career break - 30-45 minute semistructured interview                                    | Career break or leavers - one year break        | Qualitative - Content analysis                                        | 14 foundation year doctors (2-3 years post medical degree)                       | Invitation email from training programme, final sample selected purposively                            | UK     | 8/14 female, mean age 30 (range 27-35), 10/14 white British                                                              | Not reported      | A career break can have a positive personal impact on doctors and provide resources for their future career and practice. Personal - fatigue, exhaustion and stress, career support and decisions, job and career control, integrating personal experiences into being doctors (personal-professional identity)                                                                                                                                                                                                                    |                                                                                                                                                                                                                                                                  |                                                                                | Selection bias, recall bias, measurement bias, data collection bias                |
| Rosta et al (2014)[42]         | Between groups comparison             | Characteristics of sickness absence - de novo                                                       | Sick leave - any illness                        | Quantitative - Chi-squared, ANOVA, logistic regression                | 948 doctors (521 hospital doctors, 313 self-                                     | Data from previous study, postal survey from Norwegian Medical Association                             | Norway | Reported by each group in full in the paper                                                                              | 62% response rate | Self-employed doctors (primary care and private practice) are less likely to take sick leave, other than for serious and chronic conditions. Low professional autonomy and poor self-rated health predict sickness absence, more so that work                                                                                                                                                                                                                                                                                      | Reduce the threshold for sickness absence, both in terms of policy and doctors' attitudes                                                                                                                                                                        | Selection bias, recall bias, measurement bias                                  |                                                                                    |

|                            |                                       |                                                                                                |                               |                                                                                         |                                                                                   |                                                                                                            |        |                                                                                      |                                       |                                                                                                                                                                                                                                                                                                                                                                                                                                                                                                              |                                                                                                                                                                                                                       |                                                                                    |
|----------------------------|---------------------------------------|------------------------------------------------------------------------------------------------|-------------------------------|-----------------------------------------------------------------------------------------|-----------------------------------------------------------------------------------|------------------------------------------------------------------------------------------------------------|--------|--------------------------------------------------------------------------------------|---------------------------------------|--------------------------------------------------------------------------------------------------------------------------------------------------------------------------------------------------------------------------------------------------------------------------------------------------------------------------------------------------------------------------------------------------------------------------------------------------------------------------------------------------------------|-----------------------------------------------------------------------------------------------------------------------------------------------------------------------------------------------------------------------|------------------------------------------------------------------------------------|
|                            |                                       | quantitative survey                                                                            |                               |                                                                                         | employed primary care or private doctors                                          | to a representative panel of Norwegian doctors                                                             |        |                                                                                      |                                       | stress, age and gender. Personal - self-view of health. Organisational - professional autonomy                                                                                                                                                                                                                                                                                                                                                                                                               |                                                                                                                                                                                                                       |                                                                                    |
| Sattari et al (2016)[43]   | Cross-sectional survey                | Infant-feeding intention & behaviour - de novo quantitative survey                             | Parental leave - maternity    | Quantitative – Descriptive statistics & inferential analysis (no further details given) | 72 female internal medicine doctors                                               | Data from previous study, recruitment email via training program directors and hospital Women's Task Force | US     | Mean age 38 (range 27-58), 26% trainees and 74% consultants, range of IM specialties | Not reported                          | Only 26% of respondents had received education about breastfeeding. Breastfeeding intention is high but behaviour is prevented due to work factors, including insufficient time for milk expression and inadequate milk supply. Personal - education and awareness, managing disclosure. Social - colleague and peer support. Organisational - flexibility and time through work design, senior colleague awareness and supportive facilities                                                                | Education on infant-feeding, from medical school through to the workplace                                                                                                                                             | Selection bias, recall bias, measurement bias, analysis bias (lack of methodology) |
| Saunders et al (2020)[44]  | Naturalistic observation              | Returner needs, experience and outcomes of training – unstructured observation and field notes | All reasons included          | Qualitative – Thematic analysis                                                         | 58 doctors, 4 allied health professionals, 1 nurse, 1 other clinical professional | Opportunity sampling through training participation                                                        | UK     | Not reported                                                                         | Not applicable                        | Emergent themes relating to participants' needs were psychosocial needs, peer support, and psychological concepts such as self-perception. Personal - psychosocial needs relating to their return to work, wellbeing and self-care, work-life balance, self-esteem, self-identity, confidence. Social - feeling valued, peer support, peer learning, shared experience and not feeling alone or socially isolated, accessing support, respect of peers. Organisational – senior colleague support            |                                                                                                                                                                                                                       | Selection bias, measurement bias, analysis bias                                    |
| van Boxel et al (2020)[45] | Cross-sectional survey                | Confidence on RTW - de novo mixed methods survey                                               | Parental leave - maternity    | Mixed method – Descriptive statistics                                                   | 146 paediatric doctors                                                            | Invitation email via deaneries/training programs                                                           | UK     | Not reported - 120/126 had returned to work                                          | Not reported                          | 96% of returners reported a lack of confidence, with 36% requiring more than 3 months to return to pre-absence confidence levels. Personal - childcare, confidence, work-life balance and managing commitments, managing emotional stress. Organisational - supervisor support, keeping in touch/unfamiliar workplace, work design and time                                                                                                                                                                  | Use a risk stratification score, the 'MoTHER' score, to identify doctors likely to have low confidence on RTW (Months out, Training stage, Hours worked on return, Educational activities, Recognition by consultant) | Selection bias, recall bias, measurement bias, analysis bias (lack of methodology) |
| Walsh et al (2005)[46]     | Qualitative semistructured interviews | Experience of maternity leave - semistructured interviews                                      | Parental leave - maternity    | Qualitative - Thematic analysis                                                         | 21 family medicine doctors                                                        | Invitation letter from the Postgraduate Program Director                                                   | Canada | Not reported                                                                         | 78% response rate                     | Personal - high expectations, stress, childcare and breastfeeding, WLB, sleep & fatigue. Social - professional culture, guilt from absences & workload colleagues, colleague and peer support (reduced post-pregnancy without visible difference). Organisational - work design (long hours, unpredictable work demands), staffing management, organisational culture, physical strain, flexibility, facilities (breaks, privacy, fridges), keeping in touch (can improve perceived skills and peer support) | Resources - paid leave, supportive colleagues & seniors, flexible schedules, phased/gradual return.                                                                                                                   | Selection bias, recall bias, data collection bias, analysis bias                   |
| Finlayson et al (2013)[47] | Between groups comparison             | Characteristics & morbidity of fitness for duty referrals - historic patient data              | Referred for fitness for duty | Quantitative – Descriptive statistics, t-tests or chi-squared, logistic regression      | 381 doctors                                                                       | Recruited at fitness for duty evaluation (consent process not described)                                   | US     | 70% male, 71% white, mean age 49                                                     | Not reported                          | 70% of those referred were deemed fit to practice and not offered additional support. Personal - psychological support, behavioural guidance and training                                                                                                                                                                                                                                                                                                                                                    | Biopsychosocial evaluation of doctors, their life and their workplace are required for adequate remediation and supported RTW                                                                                         | Analysis bias (team involved)                                                      |
| Isaksson et al (2012)[48]  | 3-year follow-up intervention study   | Emotional exhaustion - Maslach Burnout Inventory                                               | Sick leave - severe distress  | Quantitative - T-tests or chi-squared, linear regression                                | 227 doctors (184 at 3-year follow-up)                                             | Invitation upon accessing intervention                                                                     | Norway | Not described, but used in analyses                                                  | 94% response rate, 19% attrition rate | Length of full-time sickness absence following a counselling intervention can predict reduced burnout 3 years after initial sickness. No optimum length was found so this should be personalised. Personal - fatigue, emotional exhaustion. Organisational - tailoring of support to individual                                                                                                                                                                                                              | Ensure that personal needs are considered on an individual basis                                                                                                                                                      | Analysis bias (team involved)                                                      |
| Kodama et al (2012)[49]    | Between groups comparison             | Working practices - mandatory 'National Survey of Physicians'                                  | All reasons included          | Quantitative – Descriptive statistics                                                   | 86,459 doctors                                                                    | Mandatory workforce survey distributed via workplaces                                                      | Japan  | Not reported                                                                         | 90% response rate                     | The number of female doctors on leave is increasing faster than those returning. Personal - work-life balance and managing care-giver requirements. Organisational - flexibility of working practices, workload and staffing management                                                                                                                                                                                                                                                                      | Create a working environment that allows female doctors to stay or return to work, starting with policy and workforce planning                                                                                        |                                                                                    |
| Rose et al (2013)[50]      | Between groups comparison             | Substance misuse relapse & RTW - clinical records data                                         | Sick leave - substance misuse | Quantitative - T-tests or chi-squared                                                   | 780 doctors (56 emergency physicians, 724 non-emergency physicians)               | Data from previous study, sampling not described                                                           | US     | Reported by each group in full in the paper                                          | Not reported                          | There is a higher rate of substance use disorders in emergency physicians, but comparable completion rates of support programs including RTW (72-84%). Personal - psychological health needs. Organisational - Occupational Health programs, personalised for doctors                                                                                                                                                                                                                                        | No differences between specialties in use and completion of support programs.                                                                                                                                         |                                                                                    |

\*risk of bias that was adequately addressed in the article has not been included here
