# Supplementary material for: Returning to clinical work and doctors’ personal, social and organisational needs: a systematic review
Source: HighWire-hosted journal article supplement (doi:10.1136/bmjopen-2021-053798), 2022-05-01
Supplement: bmjopen-2021-053798supp004_data_supplement.pdf [file bmjopen-2021-053798supp004_data_supplement.pdf]

Table 1. Search terms.

| Search terms      |                                                                                                                                                                                                                                                                            |
|-------------------|----------------------------------------------------------------------------------------------------------------------------------------------------------------------------------------------------------------------------------------------------------------------------|
| <b>Population</b> | Doctor* OR Physician*                                                                                                                                                                                                                                                      |
|                   | AND                                                                                                                                                                                                                                                                        |
| <b>Condition</b>  | "Back-to-work" OR "Back to work" OR "Return-to-work" OR "Return to work" OR "Return to practice" OR "Return to training" OR "Job return" OR absen*                                                                                                                         |
|                   | AND                                                                                                                                                                                                                                                                        |
| <b>Outcomes</b>   | "Job resource*" OR "Work resource*" OR Psychosocial OR "Psych* need*" OR "Personal need*" OR "Psych* issue*" OR "Personal issue*" OR "Psych* concern*" OR "Personal concern*" OR Psychological OR "health need*" OR "social need*" OR "organisation* need" OR "work* need" |
|                   | NOT                                                                                                                                                                                                                                                                        |
|                   | Patient                                                                                                                                                                                                                                                                    |

### Journal database searches

Journal database searches involved running one search each based on population, on condition, and on outcomes:

1. *Doctor\* OR Physician\**
2. *"Back-to-work" OR "Back to work" OR "Return-to-work" OR "Return to work" OR "Return to practice" OR "Return to training" OR "Job return" OR absen\**
3. *"Job resource\*" OR "Work resource\*" OR Psychosocial OR "Psych\* need\*" OR "Personal need\*" OR "Psych\* issue\*" OR "Personal issue\*" OR "Psych\* concern\*" OR "Personal concern\*" OR Psychological OR "health need\*" OR "social need\*" OR "organisation\* need" OR "work\* need"*

These searches were then combined to create one search string, with the following filters and limits:

- No time/date limit
- Must be available in English
- *NOT Patient*

### Google and Google Scholar searches

These databases were searched without filters or limits using the following combined search string pasted into the search bar:

- Doctor\* OR Physician\* **AND** "Back-to-work" OR "Back to work" OR "Return-to-work" OR "Return to work" OR "Return to practice" OR "Return to training" OR "Job return" OR absen\* **AND** "Job resource\*" OR "Work resource\*" OR Psychosocial OR "Psych\* need\*" OR "Personal need\*" OR "Psych\* issue\*" OR "Personal issue\*" OR "Psych\* concern\*" OR "Personal concern\*" OR Psychological OR "health need\*" OR "social need\*" OR "organisation\* need" OR "work\* need" **NOT** Patient
